# Supplementary material for: Novel Insight into the Volatile Profile and Antioxidant Properties of Crocus sativus L. Flowers
Source: MDPI journal article supplement (doi:10.3390/antiox11091650), 2022-08-25
Supplement: s1 [file s1]

**Table S1.** Identification, quantification and descriptors of volatile compounds found in saffron floral by-products.

| Code | Compound                                   | CF       | RT     | KI LIT | KI EXP | Odor Descriptors <sup>1</sup> |
|------|--------------------------------------------|----------|--------|--------|--------|-------------------------------|
| V1   | Acetic acid                                | Acid     | 2.441  | 645    | 646    | Pungent, sour, vinegar        |
| V2   | Butanal, 3-methyl- (Isovaleraldehyde)      | Aldehyde | 3.370  | 690    | 686    | Chocolate, peach, fatty       |
| V3   | Butanal, 2-methyl-                         | Aldehyde | 3.531  | 699    | 688    | Cocoa, musty, coffee          |
| V4   | 3-hydroxy-2-butanone (Acetoin)             | Ketone   | 4.531  | 722    | 721    | Buttery, dairy, fatty         |
| V5   | 1-Butanol, 2-methyl-                       | Alcohol  | 5.617  | 748    | 748    | Fusel, alcoholic              |
| V6   | Propanoic acid, 2-methyl-                  | Acid     | 6.163  | 760    | 757    | Sour, cheesy, rancid          |
| V7   | 2,3-Butanediol                             | Alcohol  | 7.405  | 789    | 786    | Creamy, fruity, buttery       |
| V8   | Hexanal                                    | Aldehyde | 7.888  | 800    | 800    | Green, fresh, fatty           |
| V9   | Butanoic acid, 3-methyl- (Isovaleric acid) | Acid     | 10.222 | 858    | 858    | Cheesy, sour                  |
| V10  | Butanoic acid, 2-methyl-                   | Acid     | 10.364 | 862    | 861    | Cheesy, acidic                |
| V11  | 1,2-Propanediol, 2-acetate                 | Ester    | 11.489 | 889    | 891    | Fruity                        |
| V12  | Heptanal                                   | Aldehyde | 11.941 | 894    | 893    | Green, fresh, fatty           |
| V13  | 4-Penten-1-yl acetate                      | Ester    | 11.962 | 895    | 890    | Green, plastic, vegetable     |
| V14  | 2(5H)-Furanone                             | Ester    | 12.104 | 906    | 913    | Buttery                       |
| V15  | Butyrolactone                              | Ester    | 12.127 | 906    | 908    | Creamy, oily, fatty           |
| V16  | Acetic acid, pentyl ester                  | Ester    | 12.449 | 914    | 912    | Fruity, banana, pear          |
| V17  | 2-Furancarboxaldehyde, 5-methyl-           | Aldehyde | 14.186 | 960    | 961    | Caramellic, sweet, coffee     |
| V18  | 1-Butanol, 3-methyl-, propanoate           | Acid     | 14.551 | 970    | 969    | Fruity, tropical, banana      |
| V19  | Carbolic acid                              | Acid     | 14.816 | 977    | 976    | Plastic                       |
| V20  | Diisoamyl ether                            | Ether    | 15.746 | 1002   | 1002   | Floral                        |
| V21  | Acetic acid, hexyl ester                   | Ester    | 16.080 | 1012   | 1011   | Fruity, green                 |
| V22  | 1-Hexanol, 2-ethyl-                        | Alcohol  | 16.653 | 1029   | 1029   | Citrus, fresh, floral         |
| V23  | D-Limonene                                 | Terpene  | 16.657 | 1029   | 1029   | Citrus, fresh                 |
| V24  | Benzeneacetaldehyde                        | Aldehyde | 17.099 | 1042   | 1043   | Green, sweet, floral          |
| V25  | Butanoic acid, pentyl ester                | Ester    | 17.596 | 1056   | 1059   | Fruity, banana, tropical      |
| V26  | Ethanone, 1-(1H-pyrrol-2-yl)-              | Ketone   | 17.717 | 1060   | 1060   | Musty, nut                    |
| V27  | Benzaldehyde, 4-methyl-                    | Aldehyde | 18.448 | 1081   | 1080   | Fruity, cherry                |

|     |                                                                                            |          |        |      |      |                                  |
|-----|--------------------------------------------------------------------------------------------|----------|--------|------|------|----------------------------------|
| V28 | 2-Nonanone                                                                                 | Ketone   | 18.734 | 1089 | 1089 | Fresh, sweet, fruity             |
| V29 | Linalool                                                                                   | Terpene  | 19.031 | 1098 | 1098 | Floral, citrus, rose             |
| V30 | Nonanal                                                                                    | Aldehyde | 19.193 | 1103 | 1102 | Waxy, aldehydic, citrus, fresh   |
| V31 | Phenylethyl Alcohol                                                                        | Alcohol  | 19.404 | 1110 | 1110 | Floral, rose                     |
| V32 | 4H-Pyran-4-one, 2,3-dihydro-3,5-dihydroxy-6-methyl- (DDMP)                                 | Other    | 20.326 | 1139 | 1140 | -                                |
| V33 | Acetic acid, 2-ethylhexyl ester                                                            | Ester    | 20.559 | 1147 | 1157 | Earthy, herbal                   |
| V34 | 2(3H)-Furanone, dihydro-4-hydroxy-                                                         | Ester    | 20.609 | 1148 | 1153 | -                                |
| V35 | Isophorone                                                                                 | Ketone   | 20.675 | 1150 | 1146 | Woody, sweet, camphoreous, musty |
| V36 | Cyclohexanone, 5-methyl-2-(1-methylethyl)-, trans- (trans-Menthone)                        | Cetone   | 20.859 | 1156 | 1152 | Minty                            |
| V37 | Acetic acid, phenylmethyl ester                                                            | Ester    | 21.000 | 1161 | 1161 | Floral, jasmine                  |
| V38 | Cyclohexanol, 5-methyl-2-(1-methylethyl)-, (1 $\alpha$ ,2 $\beta$ ,5 $\alpha$ )- (Menthol) | Cetone   | 21.529 | 1177 | 1171 | Minty                            |
| V39 | 1,3-Cyclohexadiene-1-carboxaldehyde, 2,6,6-trimethyl- (Safranal)                           | Terpene  | 22.180 | 1198 | 1201 | Fresh, herbal, saffron, spicy    |
| V40 | Benzofuran, 2,3-dihydro- (Coumaran)                                                        | Other    | 22.630 | 1213 | 1219 | Sweet                            |
| V41 | 2-Dodecene, (Z)-                                                                           | Alkene   | 22.375 | 1205 | 1213 | -                                |
| V42 | 3-Dodecene, (Z)-                                                                           | Alkene   | 22.634 | 1214 | 1222 | -                                |
| V43 | Benzaldehyde, 2,4-dimethyl-                                                                | Aldehyde | 22.659 | 1214 | 1208 | Naphthyl, sweet                  |
| V44 | 2-Cyclohexen-1-one, 2-methyl-5-(1-methylethyl)-, (S)-                                      | Terpene  | 23.656 | 1249 | 1250 | -                                |
| V45 | Benzene, 1,3-bis(1,1-dimethylethyl)-                                                       | Other    | 23.668 | 1249 | 1249 | -                                |
| V46 | Acetic acid, 2-phenylethyl ester                                                           | Ester    | 23.773 | 1252 | 1254 | Floral, honey, fruity, tropical  |
| V47 | Benzeneacetaldehyde, $\alpha$ -ethylidene-                                                 | Aldehyde | 24.200 | 1267 | 1273 | Green, floral, woody             |
| V48 | 2-Propenal, 3-phenyl-                                                                      | Aldehyde | 24.337 | 1272 | 1278 | Spicy, sweet                     |
| V49 | Dodecane, 4,6-dimethyl-                                                                    | Alkane   | 24.450 | 1276 | 1285 | -                                |
| V50 | 2-Undecanone                                                                               | Cetone   | 24.903 | 1291 | 1291 | Fruity, waxy,fatty               |
| V51 | $\alpha$ -Cubebene                                                                         | Terpene  | 27.334 | 1379 | 1380 | Herbal, waxy                     |
| V52 | Dodecanal                                                                                  | Aldehyde | 28.113 | 1408 | 1409 | Soapy, waxy                      |
| V53 | 1-Dodecanol                                                                                | Alcohol  | 29.900 | 1475 | 1474 | Waxy, earthy, soapy              |
| V54 | Lauryl acetate                                                                             | Ester    | 32.679 | 1606 | 1605 | Waxy, sweet                      |
| V55 | Hexadecanoic acid, methyl ester                                                            | Ester    | 37.034 | 1921 | 1921 | Waxy, oily, fatty                |

<sup>1</sup> Commercial flavor descriptors. or online according to: Flavornet (<http://www.flavornet.org/flavornet.html>); Bedoukian Research (<http://www.bedoukian.com/>); Sigma Aldrich SAFC. Flavors and Fragrances (<http://www.safcglobal.com/safc-supply-solutions/en-us/home/flavors-and-fragrances.html>) and The Good Scents Company (<http://www.thegoodscentscompany.com/>); FAO/WHO Expert Committee on Food Additives (JECFA)(<https://www.fao.org/food/food-safety-quality/scientific-advice/jecfa/en/>)  
CF: Chemical Family; RT: Retention Time; KI: Kovats Index; EXP: Experimental; LIT: Literature.
